# Supplementary material
Source: HighWire-hosted journal article supplement (https://erj.ersjournals.com/content/51/6/1800329)

# Supplementary figure 1

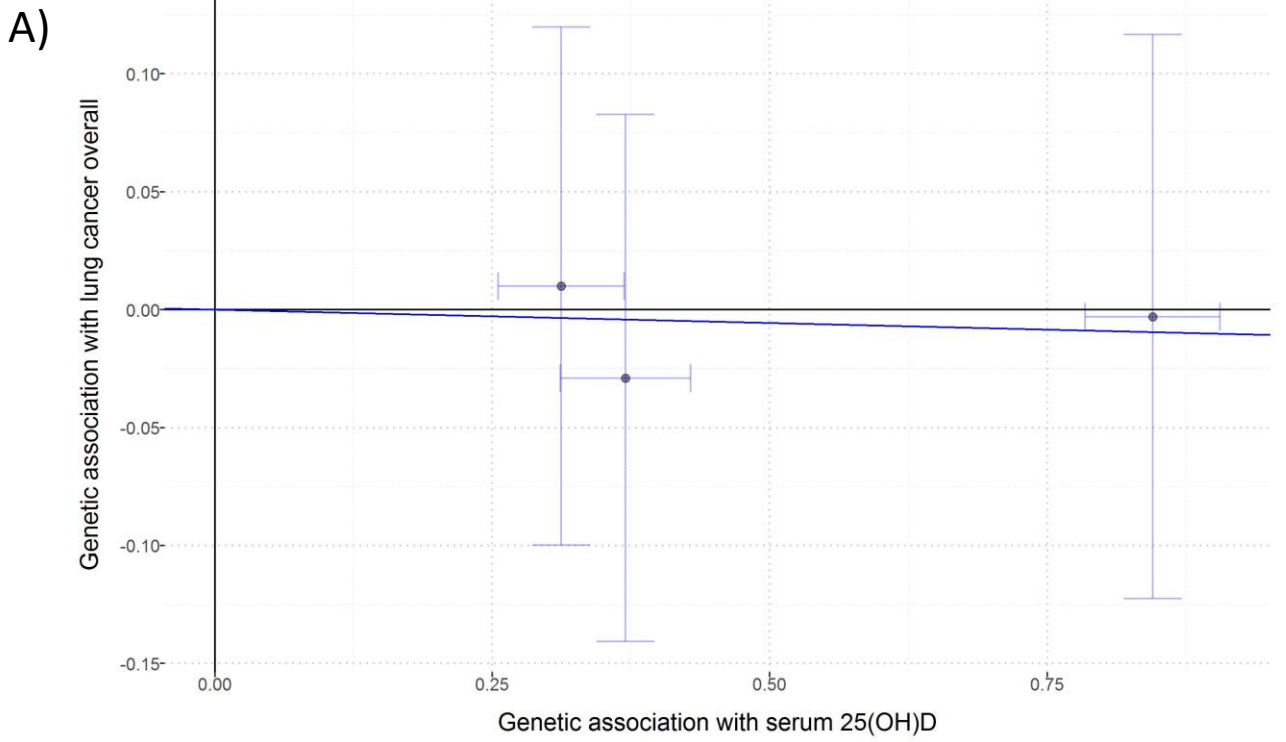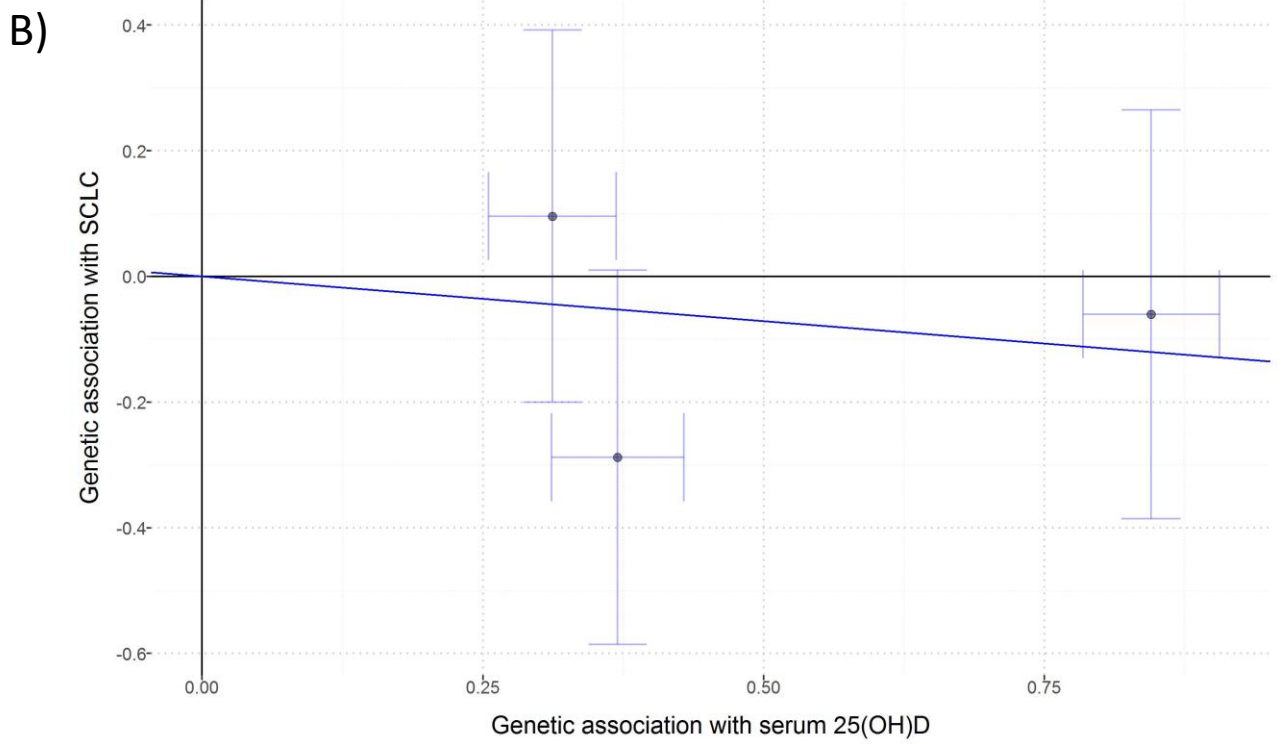

C)

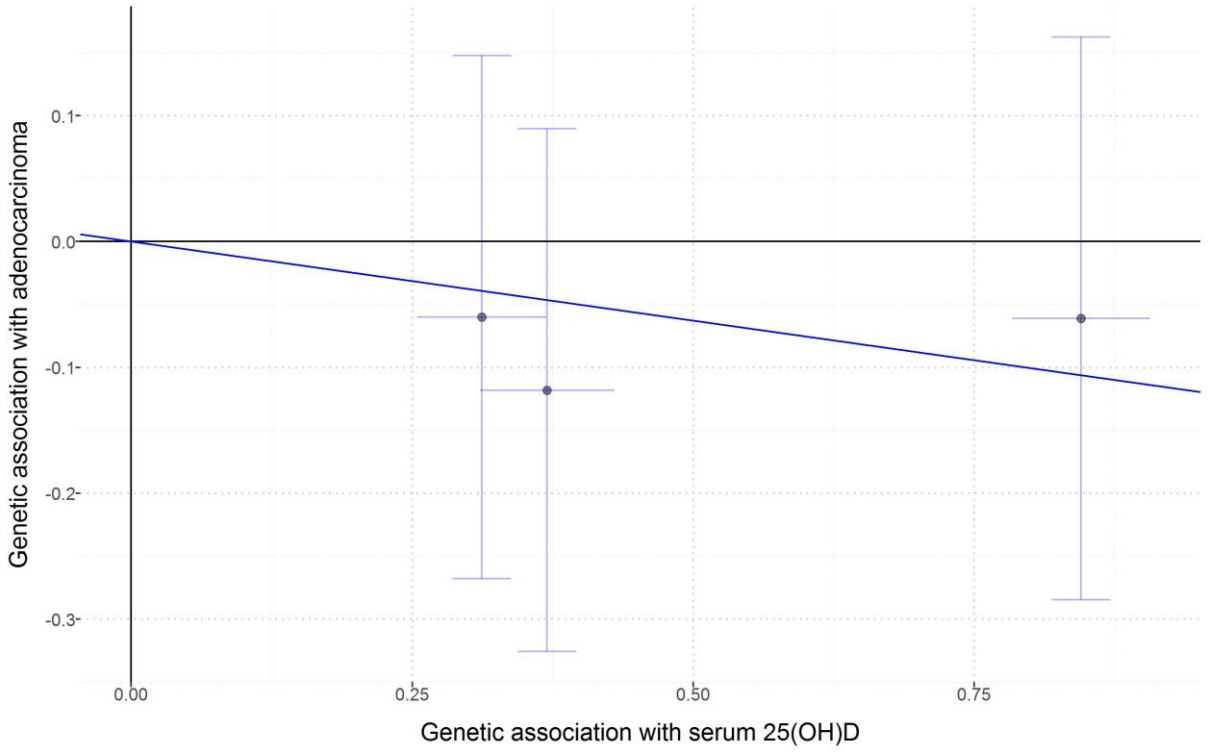

D)

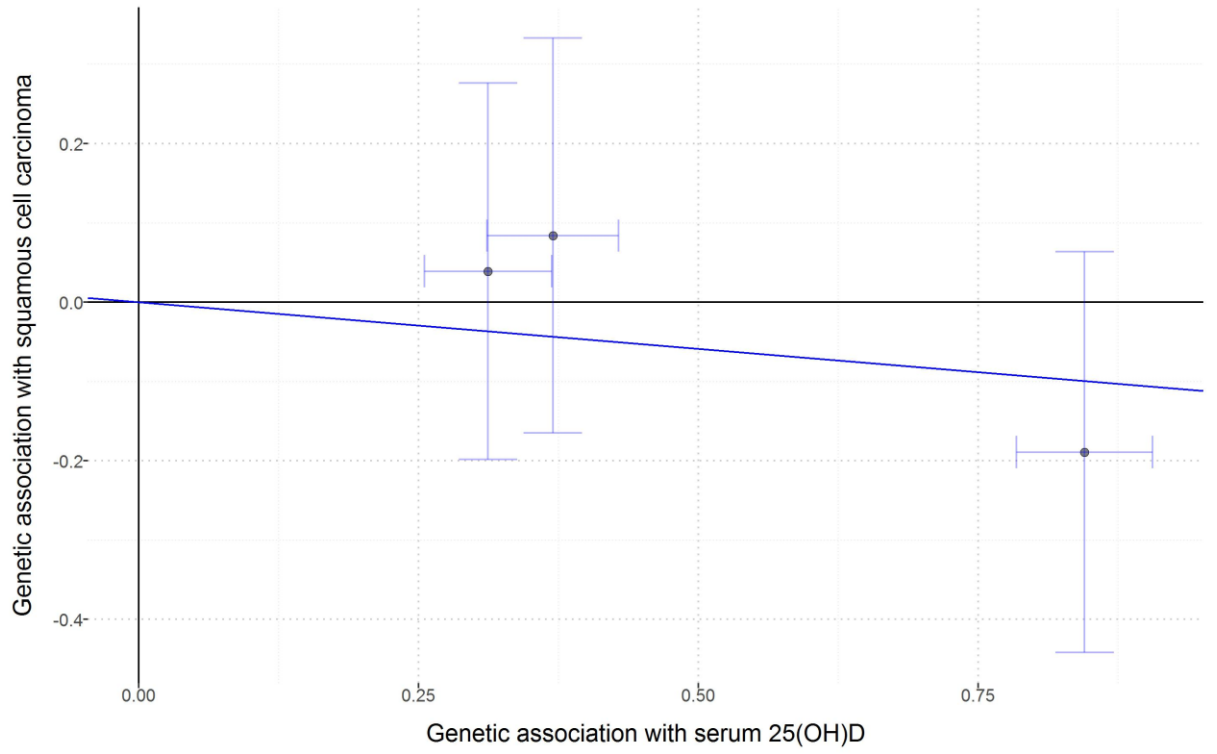

E)

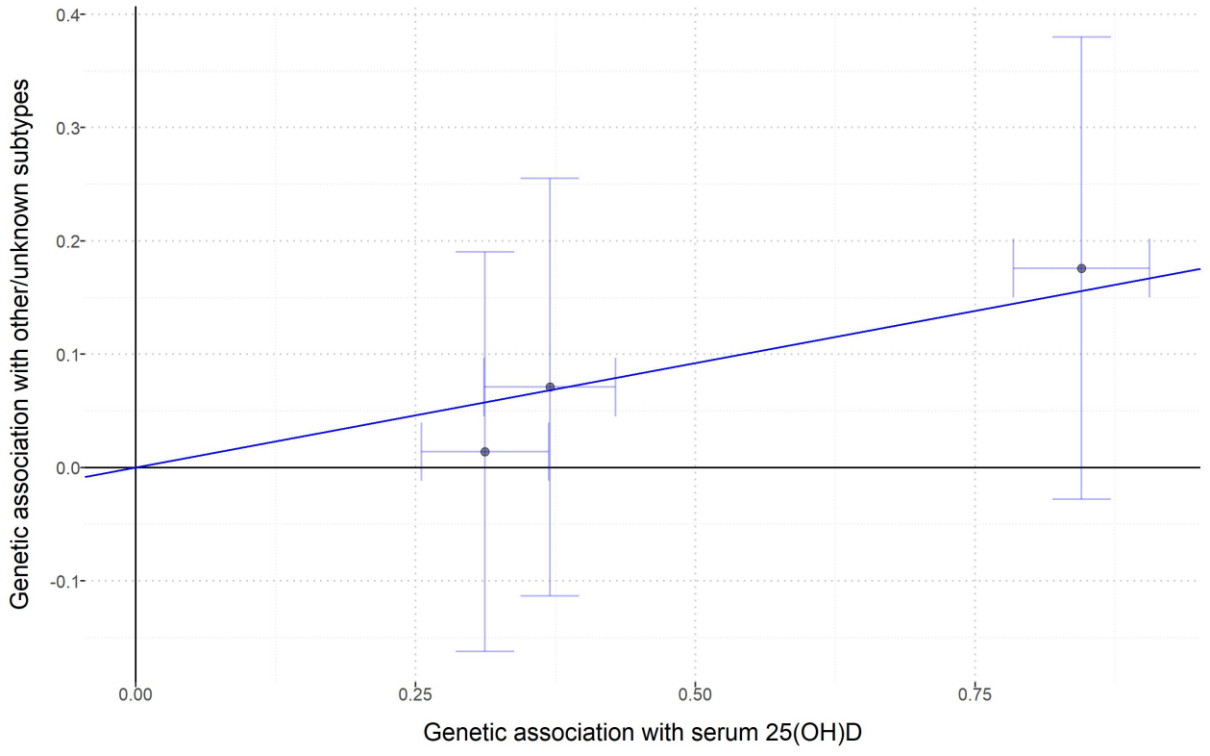

Supplement: inline-supplementary-material-1 [file inline-supplementary-material-1.pdf]
