# Supplementary material
Source: HighWire-hosted journal article supplement (https://erj.ersjournals.com/content/51/6/1800329)
Supplement: inline-supplementary-material-2 [file inline-supplementary-material-2.pdf]

## Figure legend

**Supplementary figure 1.** Effect of single-nucleotide polymorphisms (SNPs)-determined

serum 25(OH)D on the risk of lung cancer overall and histologic types in two-sample MR.

The  $\ln(\text{hazard ratio})$  for risk of outcome of each SNP (Y-axis) was plotted against each SNP's

effect on 10% increase of serum 25(OH)D (X-axis). Each trend line, derived from the

inverse-variance weighted method and set through the origin of the axes arbitrarily,

represents  $\ln(\text{HR})$  for the risk of lung cancer or histologic type per 10% increase of

genetically determined serum 25(OH)D. Vertical and horizontal lines around points show 95%

confidence intervals for each SNP. Outcomes: A) Lung cancer overall; B) Small cell lung

cancer; C) Adenocarcinoma; D) Squamous cell carcinoma; E) Other/unknown subtypes.
